# Supplementary material for: Nature-based interventions for individuals with rare skeletal disorders: evaluation of a 5-day sailing program on health-related quality of life
Source: PubMed Central journal article supplement — Sci Rep. 2024 Nov 1;14:26339. doi: 10.1038/s41598-024-77934-1 (PMC11530639; doi:10.1038/s41598-024-77934-1), 2024-11-01
Supplement: 41598_2024_77934_MOESM2_ESM.pdf [file 41598_2024_77934_MOESM2_ESM.pdf]

Supplementary Figure S2. Nave Italia 2022-2023 projects creations

## Nature-based interventions for individuals with rare skeletal disorders: evaluation of a 5-day sailing program on health-related quality of life

Manila Boarini<sup>1\*</sup>, Andrea Romeo<sup>2</sup>, Federico Banchelli<sup>1</sup>, Eleonora Grippa<sup>2</sup>, Silvia Forni<sup>2</sup>, Maria Cecilia la Forgia<sup>2</sup>, Davide Scognamiglio<sup>1</sup>, Paolo Cornaglia Ferraris<sup>3</sup>, Luca Sangiorgi<sup>1</sup>

<sup>1</sup>Department of Rare Skeletal Disorders, IRCCS Istituto Ortopedico Rizzoli, Bologna, Italy

<sup>2</sup>Associazione Conto Alla Rovescia-ACAR Aps, Roma, Italy

<sup>3</sup>Fondazione Tender to Nave Italia ETS, Genova, Italy

\*Correspondence should be addressed to Manila Boarini; [manila.boarini@ior.it](mailto:manila.boarini@ior.it) (ORCID ID: 0000-0002-9156-1772)

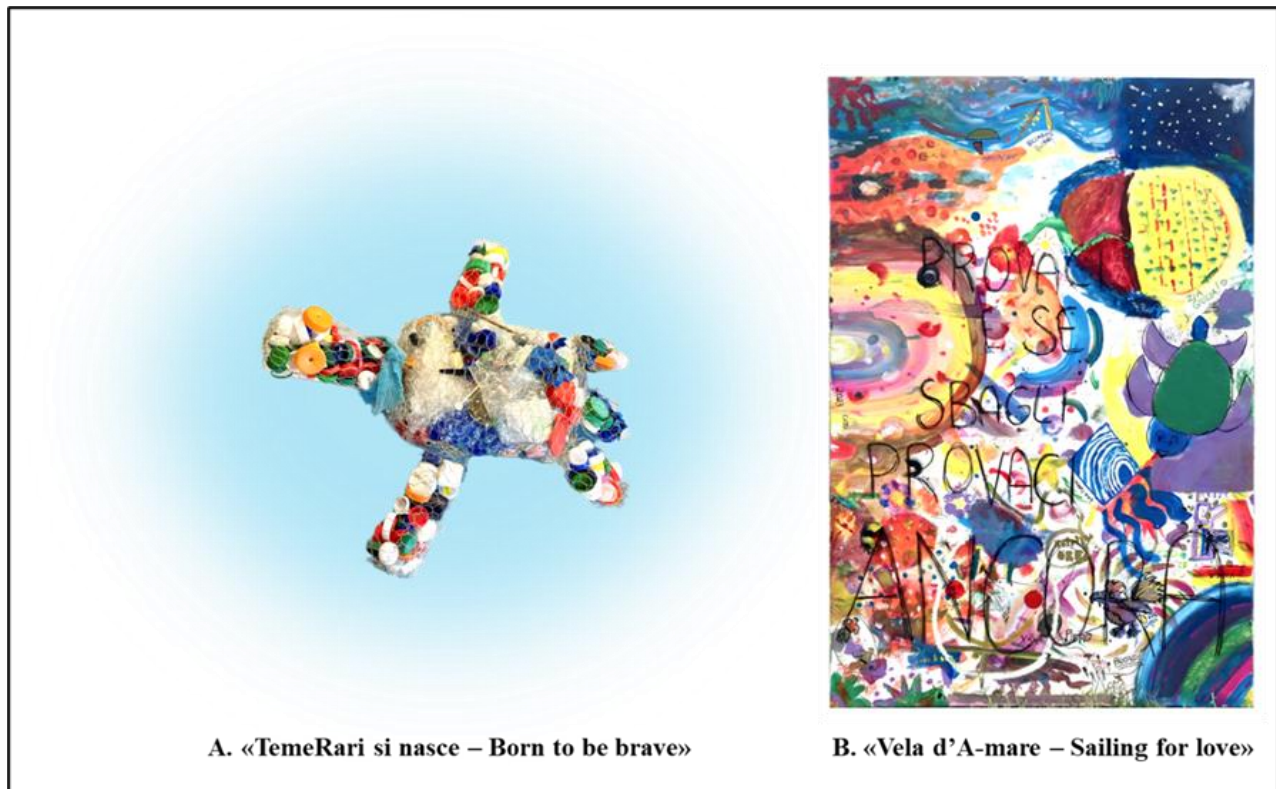

Supplementary Figure S2 illustrates the results of the two projects created by the participants.

- A. The 2022 project, named “*TemeRari si nasce*” (Born to brave), transform discarded plastic waste into creatively produced sea turtles.
- B. The 2023 project, entitled “*Vela d'A-mare*” (Sail for love), fostered the collaborative choral painting.
