# Supplementary material for: Nature-based interventions for individuals with rare skeletal disorders: evaluation of a 5-day sailing program on health-related quality of life
Source: PubMed Central journal article supplement — Sci Rep. 2024 Nov 1;14:26339. doi: 10.1038/s41598-024-77934-1 (PMC11530639; doi:10.1038/s41598-024-77934-1), 2024-11-01
Supplement: 41598_2024_77934_MOESM3_ESM.pdf [file 41598_2024_77934_MOESM3_ESM.pdf]

## Supplementary File 1. Research report form

# Nature-based interventions for individuals with rare skeletal disorders: evaluation of a 5-day sailing program on health-related quality of life

Manila Boarini<sup>1\*</sup>, Andrea Romeo<sup>2</sup>, Federico Banchelli<sup>1</sup>, Eleonora Grippa<sup>2</sup>, Silvia Forni<sup>2</sup>, Maria Cecilia la Forgia<sup>2</sup>, Davide Scognamiglio<sup>1</sup>, Paolo Cornaglia Ferraris<sup>3</sup>, Luca Sangiorgi<sup>1</sup>

<sup>1</sup>Department of Rare Skeletal Disorders, IRCCS Istituto Ortopedico Rizzoli, Bologna, Italy

<sup>2</sup>Associazione Conto Alla Rovescia-ACAR Aps, Roma, Italy

<sup>3</sup>Fondazione Tender to Nave Italia ETS, Genova, Italy

\*Correspondence should be addressed to Manila Boarini; [manila.boarini@ior.it](mailto:manila.boarini@ior.it) (ORCID ID: 0000-0002-9156-1772)

## RESEARCH REPORT FORM

Participant ID: \_\_\_\_\_

Collection Date: \_\_\_\_\_

| Characteristics   | Value                                                                                                                                                                                                  |
|-------------------|--------------------------------------------------------------------------------------------------------------------------------------------------------------------------------------------------------|
| Age (in years)    | _____                                                                                                                                                                                                  |
| Sex at birth      | 1. Male<br>2. Female                                                                                                                                                                                   |
| Disease           | 1. Multiple Osteochondromas<br>2. Ollier Disease                                                                                                                                                       |
| Education level   | 1. Lower secondary education<br>2. Upper secondary education<br>3. Bachelor's or equivalent                                                                                                            |
| Employment status | 1. Employed for wages<br>2. Self-employed<br>3. Out of work and looking for work<br>4. Out of work but not currently looking for work<br>5. Homemaker<br>6. Student<br>7. Retired<br>8. Unable to work |
