# Supplementary material for: Nature-based interventions for individuals with rare skeletal disorders: evaluation of a 5-day sailing program on health-related quality of life
Source: PubMed Central journal article supplement — Sci Rep. 2024 Nov 1;14:26339. doi: 10.1038/s41598-024-77934-1 (PMC11530639; doi:10.1038/s41598-024-77934-1), 2024-11-01
Supplement: 41598_2024_77934_MOESM4_ESM.pdf [file 41598_2024_77934_MOESM4_ESM.pdf]

## Nature-based interventions for individuals with rare skeletal disorders: evaluation of a 5-day sailing program on health-related quality of life

Manila Boarini<sup>1\*</sup>, Andrea Romeo<sup>2</sup>, Federico Banchelli<sup>1</sup>, Eleonora Grippa<sup>2</sup>, Silvia Forni<sup>2</sup>, Maria Cecilia la Forgia<sup>2</sup>, Davide Scognamiglio<sup>1</sup>, Paolo Cornaglia Ferraris<sup>3</sup>, Luca Sangiorgi<sup>1</sup>

<sup>1</sup>Department of Rare Skeletal Disorders, IRCCS Istituto Ortopedico Rizzoli, Bologna, Italy

<sup>2</sup>Associazione Conto Alla Rovescia-ACAR Aps, Roma, Italy

<sup>3</sup>Fondazione Tender to Nave Italia ETS, Genova, Italy

\*Correspondence should be addressed to Manila Boarini; [manila.boarini@ior.it](mailto:manila.boarini@ior.it) (ORCID ID: 0000-0002-9156-1772)

### EXPERIENCE PERCEPTION

We want to understand what your experience was and how you felt in the project.

Read the following questions carefully and answer them in the way that is most correct for you; there are no right or wrong answers!

For each question, indicate ONLY ONE answer.

**How satisfied were you with each of the following questions?**

| Questions                                        | Very dissatisfied | Dissatisfied | Neutral | Satisfied | Very satisfied |
|--------------------------------------------------|-------------------|--------------|---------|-----------|----------------|
| 1 The project was in line with your expectations | 0                 | 1            | 2       | 3         | 4              |
| 2 The project satisfied your needs               | 0                 | 1            | 2       | 3         | 4              |
| 3 Sail environment                               | 0                 | 1            | 2       | 3         | 4              |
| 4 Daily activities                               | 0                 | 1            | 2       | 3         | 4              |
| 5 Adventure mates                                | 0                 | 1            | 2       | 3         | 4              |
