# Supplementary material for: Nature-based interventions for individuals with rare skeletal disorders: evaluation of a 5-day sailing program on health-related quality of life
Source: PubMed Central journal article supplement — Sci Rep. 2024 Nov 1;14:26339. doi: 10.1038/s41598-024-77934-1 (PMC11530639; doi:10.1038/s41598-024-77934-1), 2024-11-01
Supplement: 41598_2024_77934_MOESM5_ESM.pdf [file 41598_2024_77934_MOESM5_ESM.pdf]

Supplementary File 3. Participants satisfaction Likert plots stratified by age, sex, and education level

## Nature-based interventions for individuals with rare skeletal disorders: evaluation of a 5-day sailing program on health-related quality of life

Manila Boarini<sup>1\*</sup>, Andrea Romeo<sup>2</sup>, Federico Banchelli<sup>1</sup>, Eleonora Grippa<sup>2</sup>, Silvia Forni<sup>2</sup>, Maria Cecilia la Forgia<sup>2</sup>, Davide Scognamiglio<sup>1</sup>, Paolo Cornaglia Ferraris<sup>3</sup>, Luca Sangiorgi<sup>1</sup>

<sup>1</sup>Department of Rare Skeletal Disorders, IRCCS Istituto Ortopedico Rizzoli, Bologna, Italy

<sup>2</sup>Associazione Conto Alla Rovescia-ACAR Aps, Roma, Italy

<sup>3</sup>Fondazione Tender to Nave Italia ETS, Genova, Italy

\*Correspondence should be addressed to Manila Boarini; [manila.boarini@ior.it](mailto:manila.boarini@ior.it) (ORCID ID: 0000-0002-9156-1772)

### STRATIFIED BY AGE

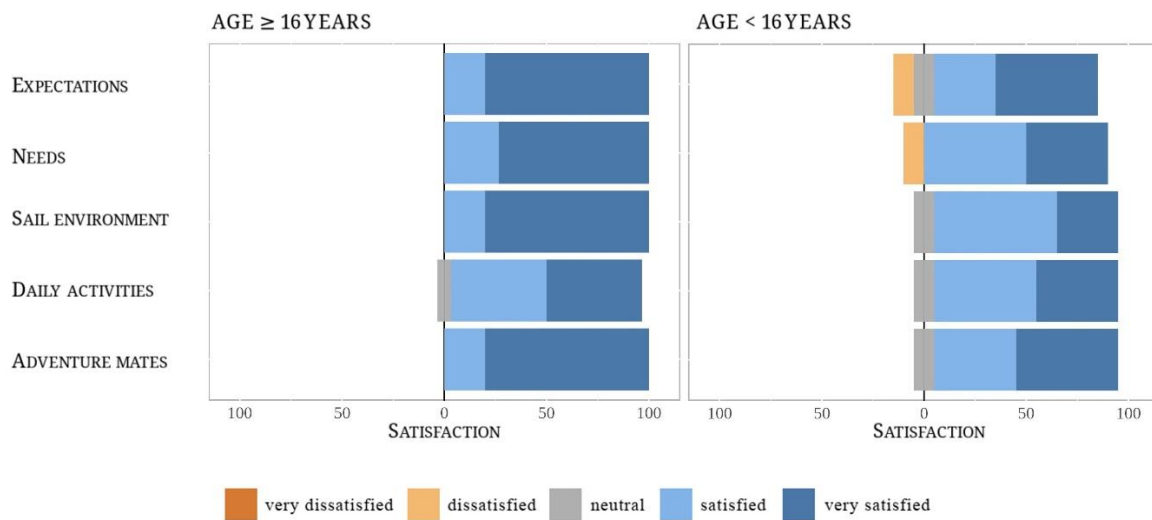

### STRATIFIED BY SEX

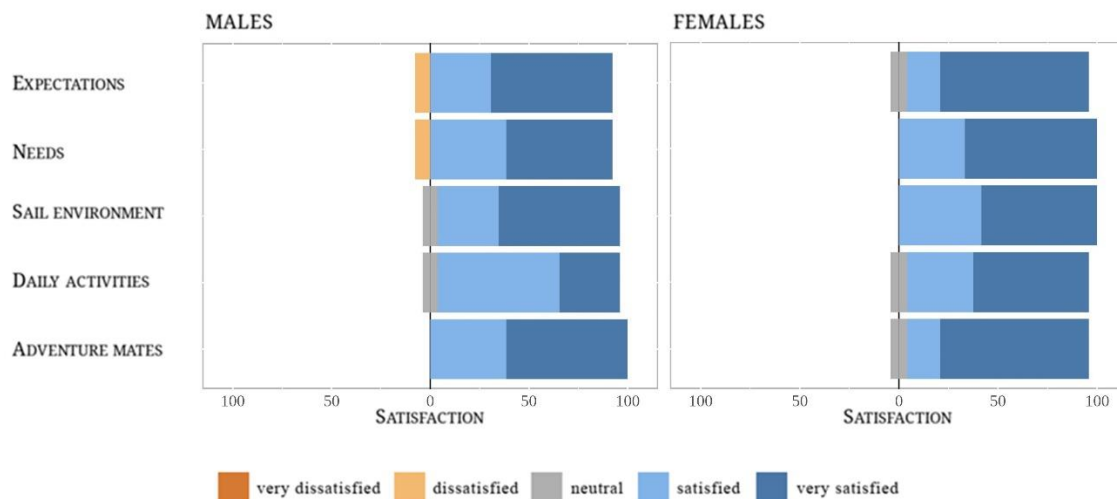

# STRATIFIED BY EDUCATION LEVEL

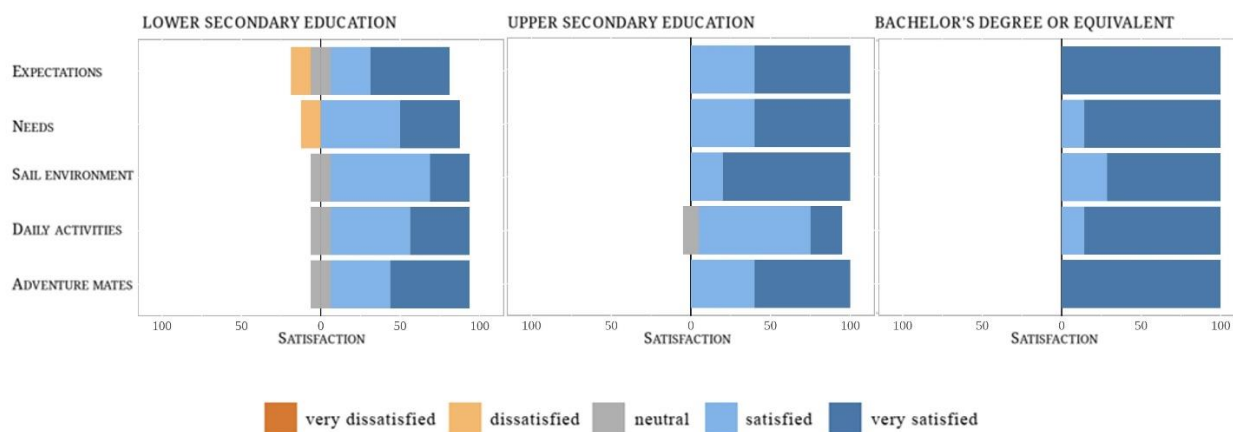

Participants satisfaction stratified by age, sex and education level compared using single or pairwise Wilcoxon signed-rank tests

| Satisfaction     | Age<br>(≥16 vs <16 years) | Sex<br>(M vs F) | Education level |         |         |
|------------------|---------------------------|-----------------|-----------------|---------|---------|
|                  |                           |                 | LS vs US        | US vs B | LS vs B |
| Expectations     | 0.09*                     | 0.53            | 1               | 0.22    | 0.13    |
| Needs            | 0.09*                     | 0.47            | 0.88            | 0.88    | 0.21    |
| Sail Environment | 0.01**                    | 1               | 0.07*           | 1       | 0.24    |
| Daily activities | 0.73                      | 0.25            | 1               | 0.04**  | 0.21    |
| Adventure mates  | 0.11                      | 0.62            | 1               | 0.22    | 0.13    |

\*\* p< 0.05; \* p< 0.10

M: males; F: females; LS: Lower Secondary education; US: Upper Secondary Education; B: Bachelor's or equivalent
