# Supplementary material for: Nature-based interventions for individuals with rare skeletal disorders: evaluation of a 5-day sailing program on health-related quality of life
Source: PubMed Central journal article supplement — Sci Rep. 2024 Nov 1;14:26339. doi: 10.1038/s41598-024-77934-1 (PMC11530639; doi:10.1038/s41598-024-77934-1), 2024-11-01
Supplement: 41598_2024_77934_MOESM6_ESM.pdf [file 41598_2024_77934_MOESM6_ESM.pdf]

**Supplementary Table 1. Before and after sailing program changes in Mobility, Self-care, Usual Activities, Pain/Discomfort, and Anxiety/Depression dimension stratified by age, sex, year of attendance, education level, and BESSI-20**

**Nature-based interventions for individuals with rare skeletal disorders: evaluation of a 5-day sailing program on health-related quality of life**

Manila Boarini<sup>1\*</sup>, Andrea Romeo<sup>2</sup>, Federico Banchelli<sup>1</sup>, Eleonora Grippa<sup>2</sup>, Silvia Forni<sup>2</sup>, Maria Cecilia la Forgia<sup>2</sup>, Davide Scognamiglio<sup>1</sup>, Paolo Cornaglia Ferraris<sup>3</sup>, Luca Sangiorgi<sup>1</sup>

<sup>1</sup>Department of Rare Skeletal Disorders, IRCCS Istituto Ortopedico Rizzoli, Bologna, Italy

<sup>2</sup>Associazione Conto Alla Rovescia-ACAR Aps, Roma, Italy

<sup>3</sup>Fondazione Tender to Nave Italia ETS, Genova, Italy

\*Correspondence should be addressed to Manila Boarini; [manila.boarini@ior.it](mailto:manila.boarini@ior.it) (ORCID ID: 0000-0002-9156-1772)

| EQ-5D Dimensions | Stratification groups        | No variation (- -) | Improved (+ -) | Worsened (- +) | No variation (+ +) | <i>p</i> -value |
|------------------|------------------------------|--------------------|----------------|----------------|--------------------|-----------------|
| Mobility         | Aggregate                    | 8 (32.0%)          | 3 (12.0%)      | 3 (12.0%)      | 11 (44.0%)         | 1               |
|                  | Age (<16 years)              | 3 (30.0%)          | 0 (0.0%)       | 3 (30.0%)      | 4 (40.0%)          | 0.25            |
|                  | Age (≥16 years)              | 5 (33.3%)          | 3 (20.0%)      | 0 (0.0%)       | 7 (46.7%)          | 0.25            |
|                  | Male                         | 5 (38.5%)          | 1 (7.7%)       | 3 (23.1%)      | 4 (30.8%)          | 0.63            |
|                  | Female                       | 3 (25.0%)          | 2 (16.7%)      | 0 (0.0%)       | 7 (58.3%)          | 0.50            |
|                  | 2022                         | 6 (50.0%)          | 2 (16.7%)      | 2 (16.7%)      | 2 (16.7%)          | 1               |
|                  | 2023                         | 2 (15.4%)          | 1 (7.7%)       | 1 (7.7%)       | 9 (69.2%)          | 1               |
|                  | Education level (<Secondary) | 2 (25.0%)          | 0 (0.0%)       | 2 (25.0%)      | 4 (50.0%)          | 0.50            |
|                  | Education level (≥Secondary) | 6 (35.3%)          | 3 (17.6%)      | 1 (5.9%)       | 7 (41.2%)          | 0.63            |
|                  | SM <sup>a</sup> (<15)        | 3 (27.3%)          | 0 (0.0%)       | 3 (27.3%)      | 5 (45.5%)          | 0.25            |
|                  | SM (≥15)                     | 5 (35.7%)          | 3 (21.4%)      | 0 (0.0%)       | 6 (42.9%)          | 0.25            |
|                  | IN <sup>b</sup> (<17)        | 3 (37.5%)          | 0 (0.0%)       | 1 (12.5%)      | 4 (50.0%)          | 1               |
|                  | IN (≥17)                     | 5 (29.4%)          | 3 (17.6%)      | 2 (11.8%)      | 7 (41.2%)          | 1               |

|                              |                              |            |           |           |            |        |
|------------------------------|------------------------------|------------|-----------|-----------|------------|--------|
| Self-Care                    | CO <sup>c</sup> (<16)        | 5 (41.7%)  | 0 (0.0%)  | 3 (25.0%) | 4 (33.3%)  | 0.25   |
|                              | CO (≥16)                     | 3 (23.1%)  | 3 (23.1%) | 0 (0.0%)  | 7 (53.8%)  | 0.25   |
|                              | SE <sup>d</sup> (<14)        | 3 (27.3%)  | 0 (0.0%)  | 3 (27.3%) | 5 (45.5%)  | 0.25   |
|                              | SE (≥14)                     | 5 (35.7%)  | 3 (21.4%) | 0 (0.0%)  | 6 (42.9%)  | 0.25   |
|                              | ER <sup>e</sup> (<12)        | 4 (33.3%)  | 0 (0.0%)  | 3 (25.0%) | 5 (41.7%)  | 0.25   |
|                              | ER (≥12)                     | 4 (30.8%)  | 3 (23.1%) | 0 (0.0%)  | 6 (46.2%)  | 0.25   |
|                              | Aggregate                    | 17 (68.0%) | 0 (0.0%)  | 7 (28.0%) | 1 (4.0%)   | 0.02** |
|                              | Age (<16 years)              | 6 (60.0%)  | 0 (0.0%)  | 4 (40.0%) | 0 (0.0%)   | 0.13   |
|                              | Age (≥16 years)              | 11 (73.3%) | 0 (0.0%)  | 3 (20.0%) | 1 (6.7%)   | 0.25   |
|                              | Male                         | 7 (53.8%)  | 0 (0.0%)  | 5 (38.5%) | 1 (7.7%)   | 0.06*  |
|                              | Female                       | 10 (83.3%) | 0 (0.0%)  | 2 (16.7%) | 0 (0.0%)   | 0.50   |
|                              | 2022                         | 7 (58.3%)  | 0 (0.0%)  | 5 (41.7%) | 0 (0.0%)   | 0.06*  |
|                              | 2023                         | 10 (76.9%) | 0 (0.0%)  | 2 (15.4%) | 1 (7.7%)   | 0.50   |
|                              | Education level (<Secondary) | 5 (62.5%)  | 0 (0.0%)  | 3 (37.5%) | 0 (0.0%)   | 0.25   |
|                              | Education level (≥Secondary) | 12 (70.6%) | 0 (0.0%)  | 4 (23.5%) | 1 (5.9%)   | 0.13   |
|                              | SM (<15)                     | 5 (45.5%)  | 0 (0.0%)  | 6 (54.5%) | 0 (0.0%)   | 0.03** |
|                              | SM (≥15)                     | 12 (85.8%) | 0 (0.0%)  | 1 (7.1%)  | 1 (7.1%)   | 1      |
|                              | IN (<17)                     | 5 (70.6%)  | 0 (0.0%)  | 3 (37.5%) | 0 (0.0%)   | 0.25   |
|                              | IN (≥17)                     | 12 (70.6%) | 0 (0.0%)  | 4 (23.5%) | 1 (5.9%)   | 0.13   |
|                              | CO (<16)                     | 7 (58.3%)  | 0 (0.0%)  | 5 (41.7%) | 0 (0.0%)   | 0.06*  |
|                              | CO (≥16)                     | 10 (76.9%) | 0 (0.0%)  | 2 (15.4%) | 1 (7.7%)   | 0.50   |
|                              | SE (<14)                     | 4 (36.4%)  | 0 (0.0%)  | 6 (54.5%) | 1 (9.1%)   | 0.03** |
|                              | SE (≥14)                     | 13 (92.9%) | 0 (0.0%)  | 1 (7.1%)  | 0 (0.0%)   | 1      |
|                              | ER (<12)                     | 6 (50.0%)  | 0 (0.0%)  | 6 (50.0%) | 0 (0.0%)   | 0.03** |
|                              | ER (≥12)                     | 11 (84.6%) | 0 (0.0%)  | 1 (7.7%)  | 1 (7.7%)   | 1      |
|                              | Aggregate                    | 6 (24.0%)  | 4 (16.0%) | 3 (12.0%) | 12 (48.0%) | 1      |
|                              | Age (<16 years)              | 1 (10.0%)  | 2 (20.0%) | 1 (10.0%) | 6 (60.0%)  | 1      |
| Age (≥16 years)              | 5 (33.3%)                    | 2 (13.3%)  | 2 (13.3%) | 6 (40.0%) | 1          |        |
| Male                         | 3 (23.1%)                    | 2 (15.4%)  | 3 (23.1%) | 5 (38.5%) | 1          |        |
| Female                       | 3 (25.0%)                    | 2 (16.7%)  | 0 (0.0%)  | 7 (58.3%) | 0.50       |        |
| 2022                         | 3 (25.0%)                    | 3 (25.0%)  | 2 (16.7%) | 4 (33.3%) | 1          |        |
| 2023                         | 3 (23.1%)                    | 1 (7.7%)   | 1 (7.7%)  | 8 (61.5%) | 1          |        |
| Education level (<Secondary) | 0 (0.0%)                     | 2 (25.0%)  | 1 (12.5%) | 5 (62.5%) | 1          |        |
| Education level (≥Secondary) | 6 (35.3%)                    | 2 (11.8%)  | 2 (11.8%) | 7 (41.1%) | 1          |        |
| Usual Activities             |                              |            |           |           |            |        |
|                              |                              |            |           |           |            |        |
|                              |                              |            |           |           |            |        |
|                              |                              |            |           |           |            |        |
|                              |                              |            |           |           |            |        |
|                              |                              |            |           |           |            |        |
|                              |                              |            |           |           |            |        |
|                              |                              |            |           |           |            |        |
|                              |                              |            |           |           |            |        |
|                              |                              |            |           |           |            |        |
|                              |                              |            |           |           |            |        |
|                              |                              |            |           |           |            |        |
|                              |                              |            |           |           |            |        |
|                              |                              |            |           |           |            |        |

|                    |                              |           |           |           |             |      |
|--------------------|------------------------------|-----------|-----------|-----------|-------------|------|
| Pain/Discomfort    | SM (<15)                     | 0 (0.0%)  | 2 (18.2%) | 2 (18.2%) | 7 (63.6%)   | 1    |
|                    | SM (≥15)                     | 6 (42.9%) | 2 (14.3%) | 1 (7.1%)  | 5 (35.7%)   | 1    |
|                    | IN (<17)                     | 0 (0.0%)  | 1 (12.5%) | 2 (25.0%) | 5 (62.5%)   | 1    |
|                    | IN (≥17)                     | 6 (35.3%) | 3 (17.6%) | 1 (5.9%)  | 7 (41.2%)   | 0.63 |
|                    | CO (<16)                     | 0 (0.0%)  | 2 (16.7%) | 3 (25.0%) | 7 (58.3%)   | 1    |
|                    | CO (≥16)                     | 6 (46.2%) | 2 (15.4%) | 0 (0.0%)  | 5 (38.5%)   | 0.50 |
|                    | SE (<14)                     | 1 (9.1%)  | 1 (9.1%)  | 2 (18.2%) | 7 (63.6%)   | 1    |
|                    | SE (≥14)                     | 5 (35.7%) | 3 (21.4%) | 1 (7.1%)  | 5 (35.7%)   | 0.63 |
|                    | ER (<12)                     | 0 (0.0%)  | 1 (8.3%)  | 3 (25.0%) | 8 (66.7%)   | 0.63 |
|                    | ER (≥12)                     | 6 (46.2%) | 3 (23.1%) | 0 (0.0%)  | 4 (30.8%)   | 0.25 |
|                    | Aggregate                    | 0 (0.0%)  | 1 (4.0%)  | 4 (16.0%) | 20 (80.0%)  | 0.38 |
|                    | Age (<16 years)              | 0 (0.0%)  | 0 (0.0%)  | 3 (30.0%) | 7 (70.0%)   | 0.25 |
|                    | Age (≥16 years)              | 0 (0.0%)  | 1 (6.7%)  | 1 (6.7%)  | 13 (86.7%)  | 1    |
|                    | Male                         | 0 (0.0%)  | 0 (0.0%)  | 4 (30.8%) | 9 (69.2%)   | 0.13 |
|                    | Female                       | 0 (0.0%)  | 1 (8.3%)  | 0 (0.0%)  | 11 (91.7%)  | 1    |
|                    | 2022                         | 0 (0.0%)  | 1 (.3%)   | 4 (33.3%) | 7 (58.3%)   | 0.38 |
|                    | 2023                         | 0 (0.0%)  | 0 (0.0%)  | 0 (0.0%)  | 13 (100.0%) | 1    |
|                    | Education level (<Secondary) | 0 (0.0%)  | 0 (0.0%)  | 1 (12.5%) | 7 (87.5%)   | 1    |
|                    | Education level (≥Secondary) | 0 (0.0%)  | 1 (5.9%)  | 3 (17.6%) | 13 (76.5%)  | 0.63 |
|                    | SM (<15)                     | 0 (0.0%)  | 0 (0.0%)  | 3 (27.3%) | 8 (72.7%)   | 0.25 |
|                    | SM (≥15)                     | 0 (0.0%)  | 1 (7.1%)  | 1 (7.1%)  | 12 (85.8%)  | 1    |
|                    | IN (<17)                     | 0 (0.0%)  | 0 (0.0%)  | 3 (37.5%) | 5 (62.5%)   | 0.25 |
|                    | IN (≥17)                     | 0 (0.0%)  | 1 (5.9%)  | 1 (5.9%)  | 15 (88.2%)  | 1    |
|                    | CO (<16)                     | 0 (0.0%)  | 0 (0.0%)  | 3 (25.0%) | 9 (75.0%)   | 0.25 |
|                    | CO (≥16)                     | 0 (0.0%)  | 1 (7.7%)  | 1 (7.7%)  | 11 (84.6%)  | 1    |
|                    | SE (<14)                     | 0 (0.0%)  | 0 (0.0%)  | 2 (18.2%) | 9 (81.8%)   | 0.50 |
|                    | SE (≥14)                     | 0 (0.0%)  | 1 (7.1%)  | 2 (14.3%) | 11 (78.6%)  | 1    |
|                    | ER (<12)                     | 0 (0.0%)  | 0 (0.0%)  | 3 (25.0%) | 9 (75.0%)   | 0.25 |
|                    | ER (≥12)                     | 0 (0.0%)  | 1 (7.7%)  | 1 (7.7%)  | 11 (84.6%)  | 1    |
|                    | Overall                      | 5 (20.0%) | 5 (20.0%) | 4 (16.0%) | 11 (44.0%)  | 1    |
|                    | Age (<16 years)              | 0 (0.0%)  | 3 (30.0%) | 3 (30.0%) | 4 (40.0%)   | 1    |
|                    | Age (≥16 years)              | 5 (33.3%) | 2 (13.3%) | 1 (6.7%)  | 7 (46.7%)   | 1    |
| Male               | 2 (15.4%)                    | 4 (30.8%) | 4 (30.8%) | 3 (23.1%) | 1           |      |
| Female             | 3 (25.0%)                    | 1 (8.3%)  | 0 (0.0%)  | 8 (66.7%) | 1           |      |
| Anxiety/Depression |                              |           |           |           |             |      |

|                              |           |           |           |           |      |
|------------------------------|-----------|-----------|-----------|-----------|------|
| 2022                         | 2 (16.7%) | 3 (25.0%) | 1 (8.3%)  | 6 (50.0%) | 0.63 |
| 2023                         | 3 (23.1%) | 2 (15.4%) | 3 (23.1%) | 5 (38.5%) | 1    |
| Education level (<Secondary) | 0 (0.0%)  | 2 (25.0%) | 2 (25.0%) | 4 (50.0%) | 1    |
| Education level (≥Secondary) | 5 (29.4%) | 3 (17.6%) | 2 (11.8%) | 7 (41.2%) | 1    |
| SM (<15)                     | 1 (9.1%)  | 2 (18.2%) | 3 (27.3%) | 5 (45.5%) | 1    |
| SM (≥15)                     | 4 (28.6%) | 3 (21.4%) | 1 (7.1%)  | 6 (42.9%) | 0.63 |
| IN (<17)                     | 1 (12.5%) | 1 (12.5%) | 2 (25.0%) | 4 (50.0%) | 1    |
| IN (≥17)                     | 4 (23.5%) | 4 (23.5%) | 2 (11.8%) | 7 (41.2%) | 0.69 |
| CO (<16)                     | 2 (16.7%) | 2 (16.7%) | 3 (25.0%) | 5 (41.6%) | 1    |
| CO (≥16)                     | 3 (23.1%) | 3 (23.1%) | 1 (7.6%)  | 6 (46.2%) | 0.63 |
| SE (<14)                     | 2 (18.2%) | 1 (9.1%)  | 3 (27.3%) | 5 (45.4%) | 0.63 |
| SE (≥14)                     | 3 (21.4%) | 4 (28.6%) | 1 (7.1%)  | 6 (42.9%) | 0.38 |
| ER (<12)                     | 1 (8.3%)  | 1 (8.3%)  | 4 (33.2%) | 6 (50.0%) | 0.38 |
| ER (≥12)                     | 4 (30.8%) | 4 (30.8%) | 0 (0.0%)  | 5 (38.4%) | 0.13 |

\*\*  $p < 0.05$ ; \*  $p < 0.10$

(- -): no problems to no problems (no variation); (+ -) any problems to no problems (improved); (- +) no problems to any problems (worsened); (+ +) any problems to any problems (no variation)

All values were expressed as  $n$  (%)

<sup>a</sup>SM: Self-Management Skills Domain; <sup>b</sup>IN: Innovation Skills Domain; <sup>c</sup>CO: Cooperation Skills Domain; <sup>d</sup>SE: Social Engagement Skills Domain; <sup>e</sup>ER: Emotional Resilience Skills Domain
